# Supplementary material for: Exosomes participate in the alteration of muscle homeostasis during lipid-induced insulin resistance in mice
Source: Springer Nature journal article supplement (doi:10.1007/s00125-014-3337-2), 2014-07-29
Supplement: MOESM1 [file 8092458]

## ESM Figure 1

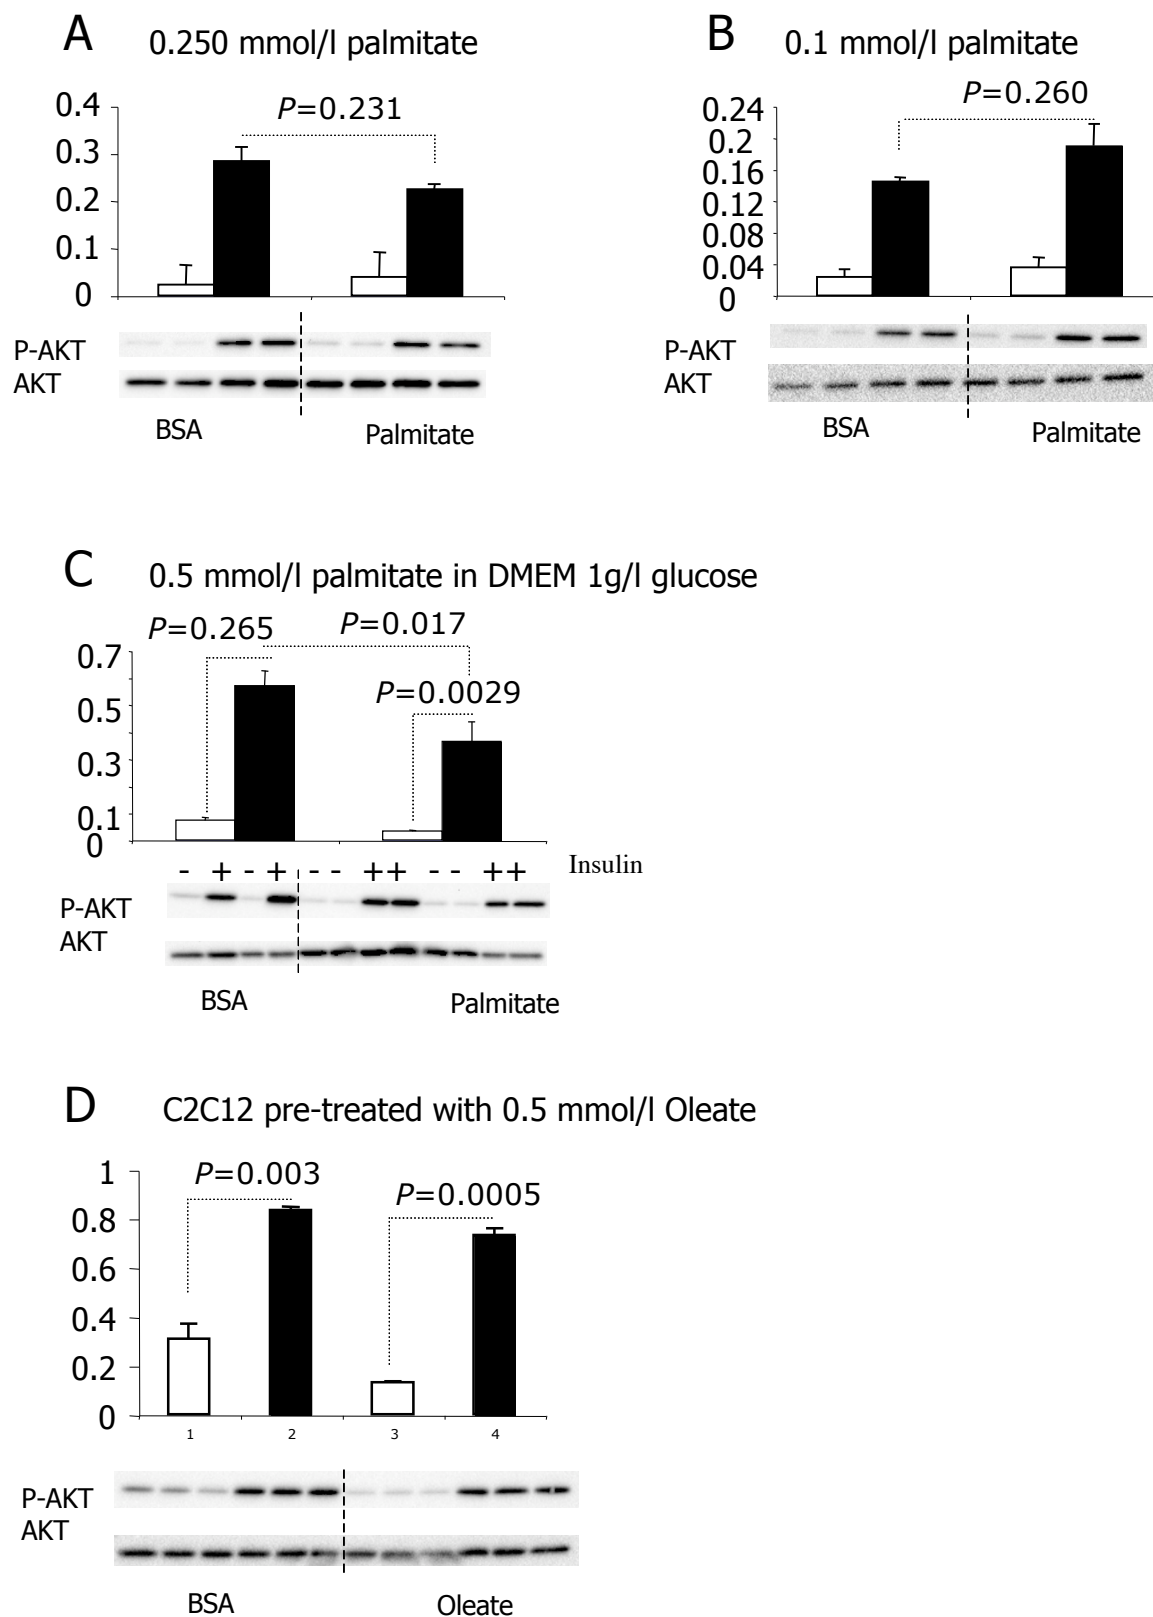

ESM Figure 1 : Phospho-AKT and AKT quantified by WB in C2C12 cell extracts.
