# Supplementary material for: Exosomes participate in the alteration of muscle homeostasis during lipid-induced insulin resistance in mice
Source: Springer Nature journal article supplement (doi:10.1007/s00125-014-3337-2), 2014-07-29
Supplement: MOESM3 [file 8092458]

ESM Figure 3

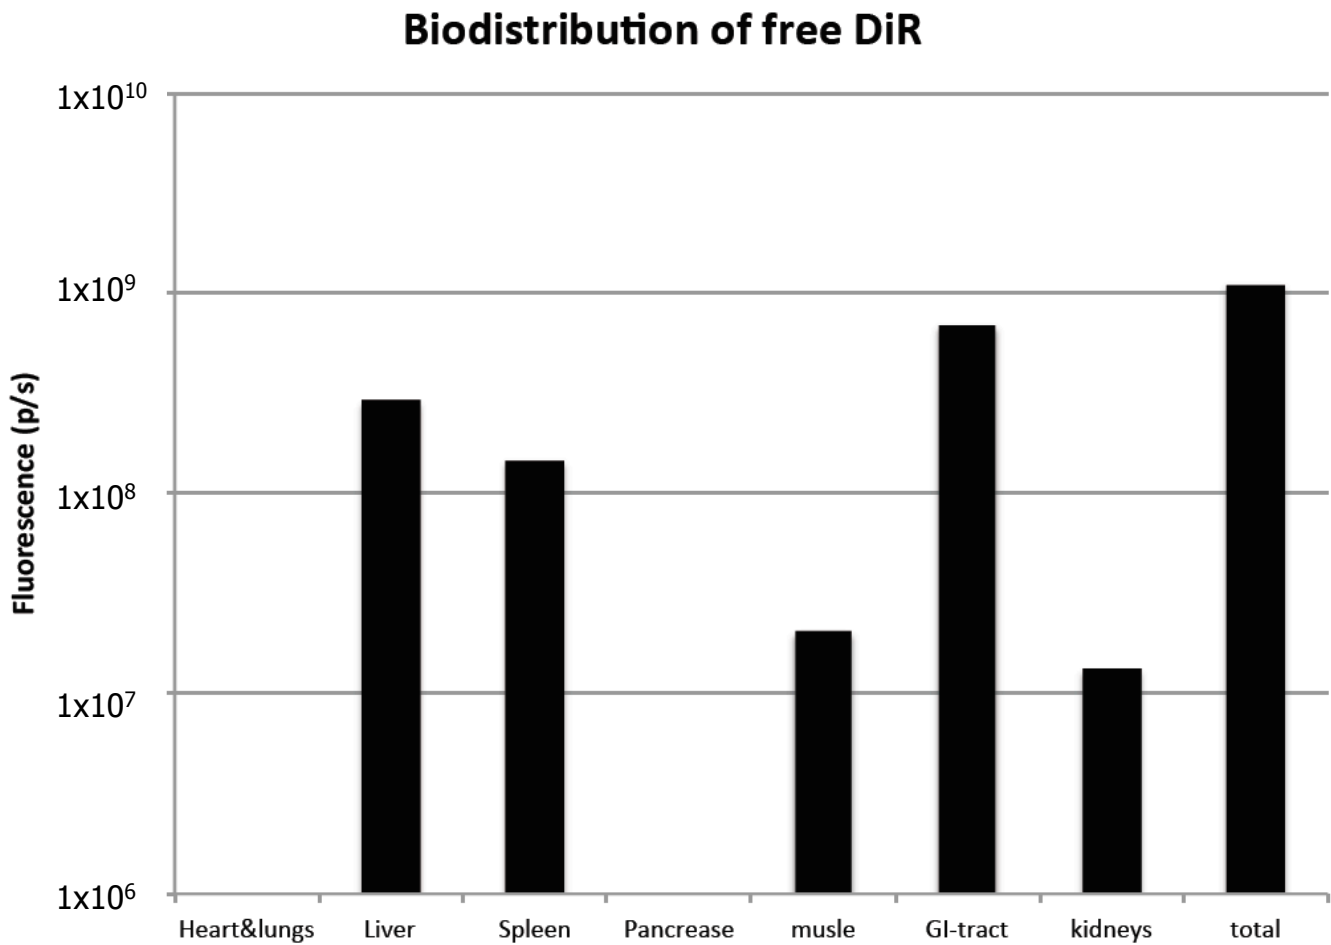

The mock-PBS-DiR was done as the labeling of exosomes but without exosomes. 25 ml PBS with 1  $\mu$ M DiR was ultracentrifuged at 110,000g for 90 min (no extra washing step, to have as much free DiR as possible as control). The pellet was resuspended in 200  $\mu$ l PBS and injected in a mouse. As shown, the distribution pattern is very different than with exosomes, with majority of the signal originating from the GI-tract.
