# Supplementary material for: Exosomes participate in the alteration of muscle homeostasis during lipid-induced insulin resistance in mice
Source: Springer Nature journal article supplement (doi:10.1007/s00125-014-3337-2), 2014-07-29
Supplement: MOESM4 [file 8092458]

ESM Figure 4

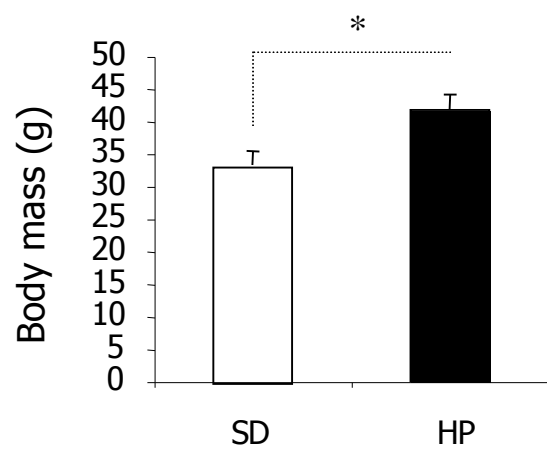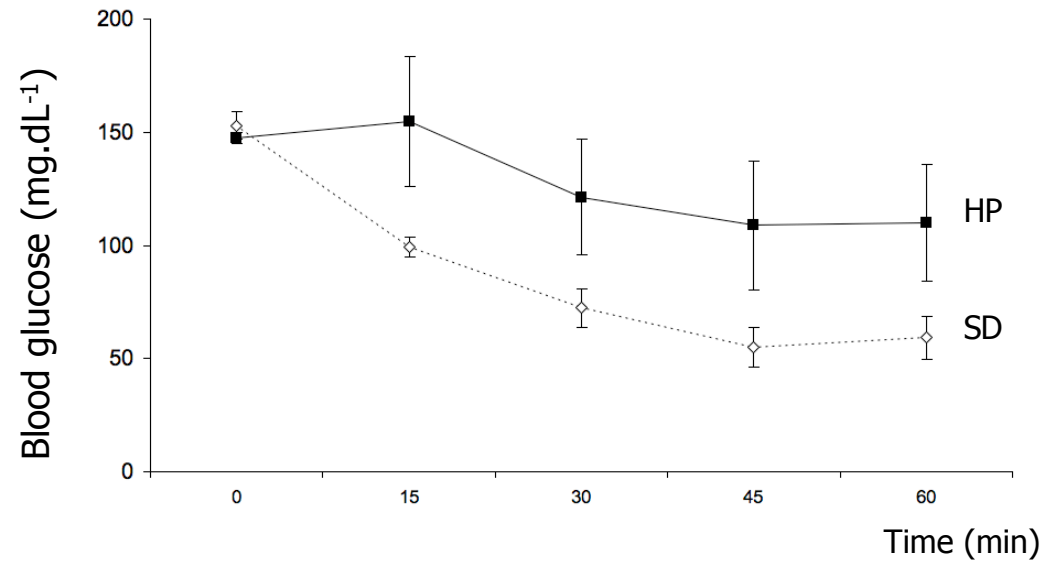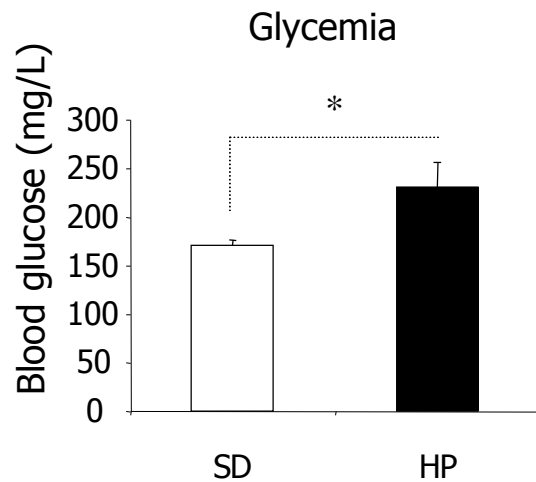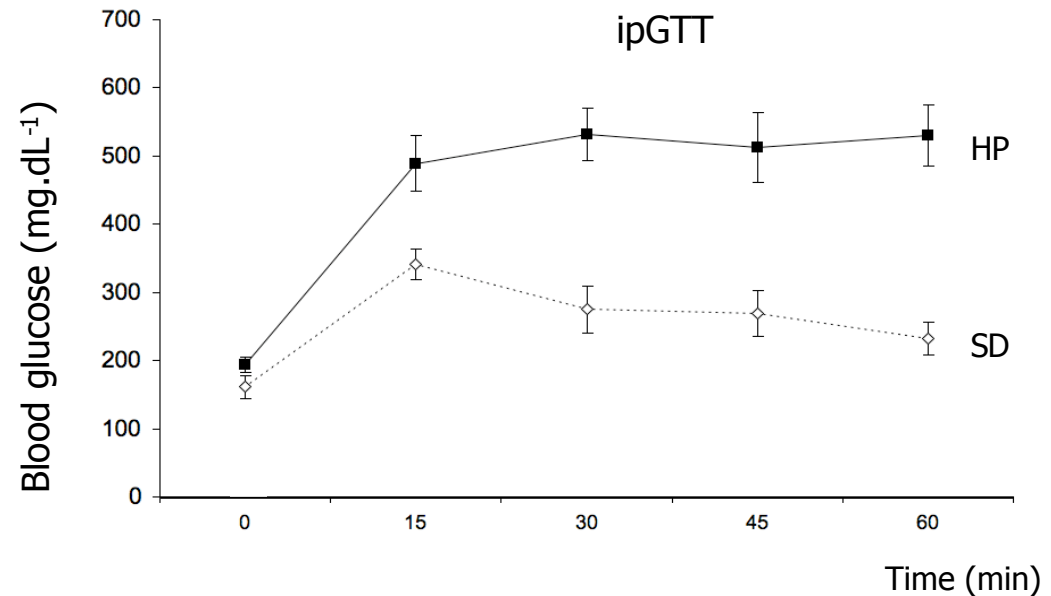

Mice metabolic parameters after 16 weeks SD or HP diets. (A,B) Body mass and glycemia measured before sacrifices under fed state. (C) i.p.IIT after 15 weeks of diet in a 6-hours fasted state. Blood glucose concentrations measured before and 15, 30, 45 and 60 min after insulin *i.p.* injection (0.75U/kg) (n=5). (D) i.p.GTT performed after 16 weeks of diet in a 6-hours fasted state. Blood glucose concentrations measured before and 15, 30, 45 and 60min after glucose *i.p.* injection (2g/kg) (n=5).
