# Supplementary material for: Exosomes participate in the alteration of muscle homeostasis during lipid-induced insulin resistance in mice
Source: Springer Nature journal article supplement (doi:10.1007/s00125-014-3337-2), 2014-07-29
Supplement: MOESM5 [file 8092458]

Supplementary Table 1: A\_PCR primers and B\_Western-blot antibodies used in this study

A

| Gene Names                                                          | Gene Symbols | Sens Primers            | Antisens Primers      |
|---------------------------------------------------------------------|--------------|-------------------------|-----------------------|
| TATAbox binding protein                                             | <i>Tbp</i>   | TTCACATCACAGCTCCCCAC    | TGGTGTGCACAGGAGCCAAG  |
| Cyclin D1                                                           | <i>Ccnd1</i> | CTTCCTCTCCAAAATGCCAG    | TGGAGGGTGGGTTGGAAATG  |
| Myogenin                                                            | <i>Myog</i>  | CAACCCAGGAGATCATTTC     | CATATCCTCCACCGTGATGC  |
| Interleukin-6                                                       | <i>Il-6</i>  | AGTTGCCTTCTTGGGACTGAT   | TCCACGATTTCCCAGAGAAC  |
| Myogenic differentiation 1                                          | <i>Myod1</i> | TCCAGCCC GCGCTCCA ACTGC | TCGACACGGCCGCACTCTTCC |
| Solute carrier family 2 (facilitated glucose transporter), member 4 | <i>Glut4</i> | GGGTTTCCAGTATGTTGCGG    | CTGGGTTTCACCTCCTGCTC  |

B

| Antibodies                                           | Antibody references | Company names  |
|------------------------------------------------------|---------------------|----------------|
| Alix                                                 | sc-49268            | Santa Cruz     |
| TSG101                                               | sc-6037             | Santa Cruz     |
| CD81                                                 | sc-166028           | Santa Cruz     |
| beta-Actin                                           | A5060               | Sigma Aldrich  |
| Phospho Akt ser-473                                  | 4060                | Cell signaling |
| total Akt                                            | 9272                | Cell signaling |
| Horseradish Peroxidase conjugated secondary antibody | 172-1019            | Bio-Rad        |
