# Supplementary material for: Exosomes participate in the alteration of muscle homeostasis during lipid-induced insulin resistance in mice
Source: Diabetologia. 2014 Jul 30;57(10):2155–64. doi: 10.1007/s00125-014-3337-2 (PMC4153976; doi:10.1007/s00125-014-3337-2)

## ESM Figure 2

**A\_** Transmission electron microscopy images. Bars=100nm (left) or 50nm (right).  
C2C12 exosomes (Exo-MT)                      muscle exosomes (Exo-Quad)

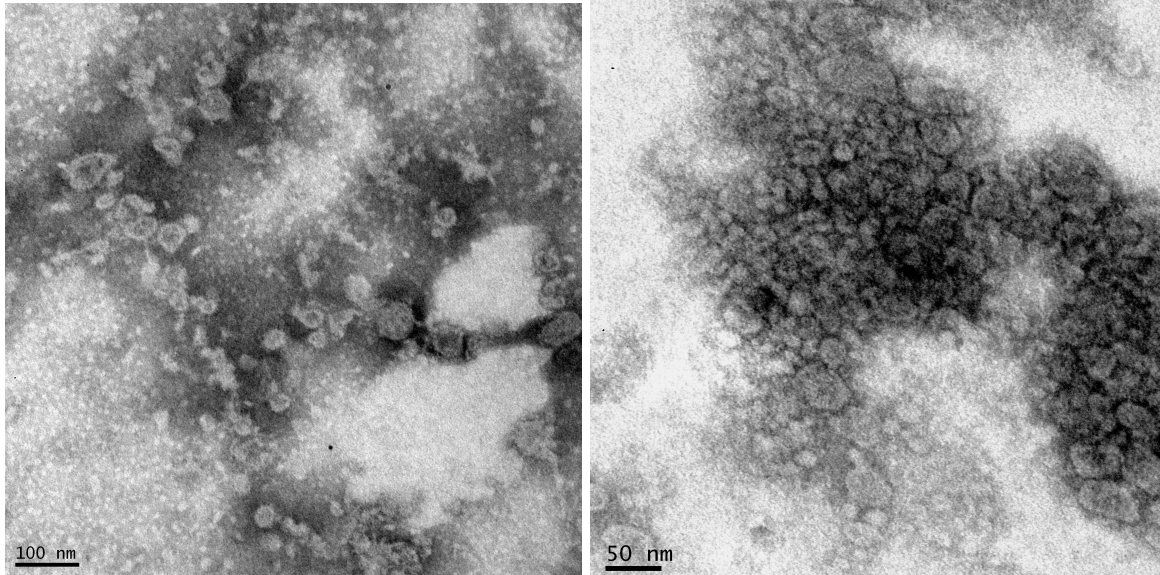

**B\_** Western-blot analyses of representative exosomal proteins

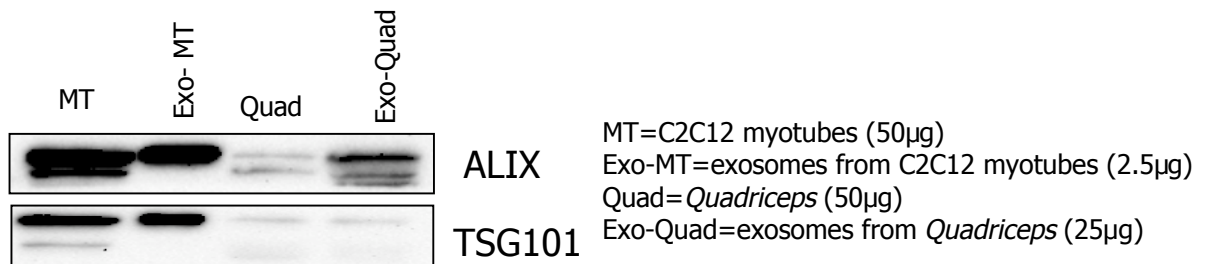

**C\_** Size distribution of muscle-released vesicles.

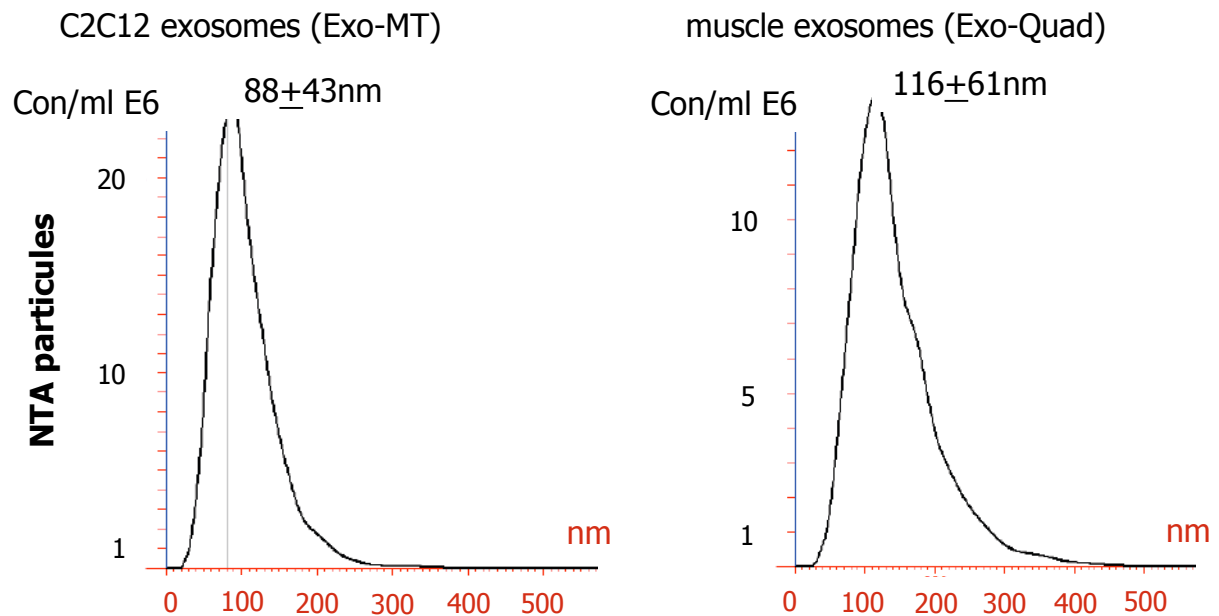

Supplement: Supplementary file 2 — (PDF 15051 kb) [file 125_2014_3337_MOESM2_ESM.pdf]
